# Supplementary material for: Protective effect of LNA-anti-miR-132 therapy on liver fibrosis in mice
Source: PubMed Central journal article supplement (PMC8368790; doi:10.1016/j.omtn.2021.05.007), 2021-05-14
Supplement: mmc1.pdf [file mmc1.pdf]

**OMTN, Volume 25**

**Supplemental information**

**Protective effect of LNA-anti-miR-132 therapy  
on liver fibrosis in mice**

**Fatemeh Momen-Heravi, Donna Catalano, Austin Talis, Gyongyi Szabo, and Shashi Bala**

## **Materials and Methods**

### **Histopathological Analysis**

Formalin-fixed liver sections were stained with hematoxylin-eosin (H&E) using standard protocols. The slides were analyzed under light microscopy at 100X.

### **Biochemical Analysis**

The liver injury was assessed at the enzymatic level by measuring alanine aminotransferase (ALT) activity from plasma samples using a kinetic method (TECO Diagnostics, CA, USA) as per manufacturer's instructions.

### **Western Blotting**

Extracellular vesicles were lysed in RIPA buffer and checked for CD63 expression by Western blot analysis as described previously<sup>1</sup>.

### **Patient Samples**

Human liver samples were obtained from the National Institutes of Health Liver Tissue Cell Distribution System (Minneapolis, MN). Liver tissues were from control subjects, and HCV patients with cirrhosis (n=8-10).

### **Cell Culture**

Hepa1.6 mouse hepatocyte cell line was purchased from ATCC and maintained in a low-glucose DMEM (Thermo Fisher Scientific, MA, USA) containing 10% FBS (HyClone Laboratories, UT, USA) at 37°C in a 5% CO<sub>2</sub> atmosphere as described previously<sup>2,3</sup>. LX2 cells were cultured in low glucose DMEM medium as described previously<sup>4</sup> and treated with 5ng/ml TGFβ for indicated

times. Cells were washed with 1XPBS twice and cells were lysed in Qiazole (Qiagen, USA) and processed for total RNA extraction (Zymo Research, USA).

### **miR target analysis and correlation studies**

Experimentally validated targets of miR-132 in the liver were predicted and visualized by miRNet and correlation studies were performed using TCGA set.

### **Transfection**

For overexpression of miR-132, cells (macrophages and hepatocytes) were seeded onto 24-well plates and next day, cells were treated either with a negative control mimic #1 or miR-132 mimic (150 pmol) and for inhibition of miR-132, cells were treated either with negative control inhibitor #1 or miR-132 inhibitor (150 pmol) for 24h (Applied Biosystems, CA, USA) using lipofectamine RNAi max reagent (Thermo Fisher Scientific, CA, USA) as described previously<sup>2,3</sup>. Some cells were either treated or not with 0.1% CCl<sub>4</sub> for the last 6h of experiment as described previously<sup>5</sup>. Cells were washed with 1XPBS for two times and lysed in RNA lysis buffer for total RNA extraction or RIPA buffer for protein extraction and stored at -80°C for further analysis.

### **Electroporation of miRNA into the exosomes and stimulation of RAW macrophages**

Loading of control or miR-132 mimic into the exosomes, isolated from THP1 cells, was performed using our previously optimized protocol<sup>1,6</sup>. Briefly, exosomes were diluted in Gene Pulser® electroporation buffer (Bio-Rad Laboratories, Berkeley, CA) in 1:1 ratio and miR-132 mimic or negative control mimic (Ambion, Grand Island, NY) at 300 pmol were mixed with exosome suspension containing 1 µg/µl exosomal protein. The suspension was transferred into cold 0.2 cm electroporation cuvettes and electroporated at 150 kV and 100 µF using a Gene pulser II System

(Bio-Rad Laboratories, Berkeley, CA) for electroporation. The exosomes were treated with one unit of RNase H to eliminate free-floating miR and re-isolated using ExoQuick-TC™. These loaded exosomes were co-cultured with RAW macrophages for 12 h. Subsequently, cells were washed to remove the free-floating exosomes and cells were cultured in the fresh DMEM high glucose medium for 24h. As a positive control, some cells were treated with LPS (10ng/ml) for 24h. At the end of stimulation, cells were washed with 1XPBS twice and cells were lysed in Qiazole (Qiagen, USA) and processed for total RNA extraction (Zymo Research, USA).

### **Statistical Analysis**

Based on data distribution, one-way analysis of variance (ANOVA) was used to compare different groups. Mann-Whitney *U* test were performed for comparing two groups. Data are presented as mean  $\pm$  standard error of mean (SEM). P values less than 0.05 was considered as statistically significant.

### **Supplementary Table 1: TCGA dataset used for analysis.**

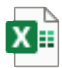

Supplementary  
Table 1.xlsx

### **Supplementary Table 2: Primer sequences are listed below.**

|                    |         |                            |
|--------------------|---------|----------------------------|
| <b>mMMP12</b>      | Forward | TGGCCATTCCCTGGGGCTGC       |
|                    | Reverse | GGGGGTTTCACTGGGGCTCCATA    |
| <b>mFoxo3</b>      | Forward | GGAATCGTACGCCCTCCCG        |
|                    | Reverse | TGCTCTCTCCTCTCGAGCC        |
| <b>mSIRT1</b>      | Forward | CGGCTACCGAGGTCCATATAC      |
|                    | Reverse | CAGCTCAGGTGGAGGAATTGT      |
| <b>mCOX2</b>       | Forward | GCCTACTACAAGTGTTTCTTTTGGCA |
|                    | Reverse | CATTTTGTTTGATTGTTACACCCAT  |
| <b>mIL1B1</b>      | Forward | TGGACCTTCCAGGATGAGGACA     |
|                    | Reverse | GTTTCATCTCGGAGCCTGTAGTG    |
| <b>mTGFB1</b>      | Forward | CAAGGGCTACCATGCCAACT       |
|                    | Reverse | GTACTGTGTGTCCAGGCTCCAA     |
| <b>mMCP1</b>       | Forward | GCTACAAGAGGATCACCAGCAG     |
|                    | Reverse | GTCTGGACCCATTCCTTCTTGG     |
| <b>mVimentin</b>   | Forward | CCCTCACCTGTGAAGTGGAT       |
|                    | Reverse | TCCAGCAGCTTCTGTAGGT        |
| <b>mN-cadherin</b> | Forward | TGAAACGGCGGGATAAAGAG       |
|                    | Reverse | GGCTCCACAGTATCTGGTTG       |
| <b>m18s</b>        | Forward | GCAATTATTCCCCATGAACG       |
|                    | Reverse | GGCCTCACTAAACCATCCAA       |

Supplementary Figure 1

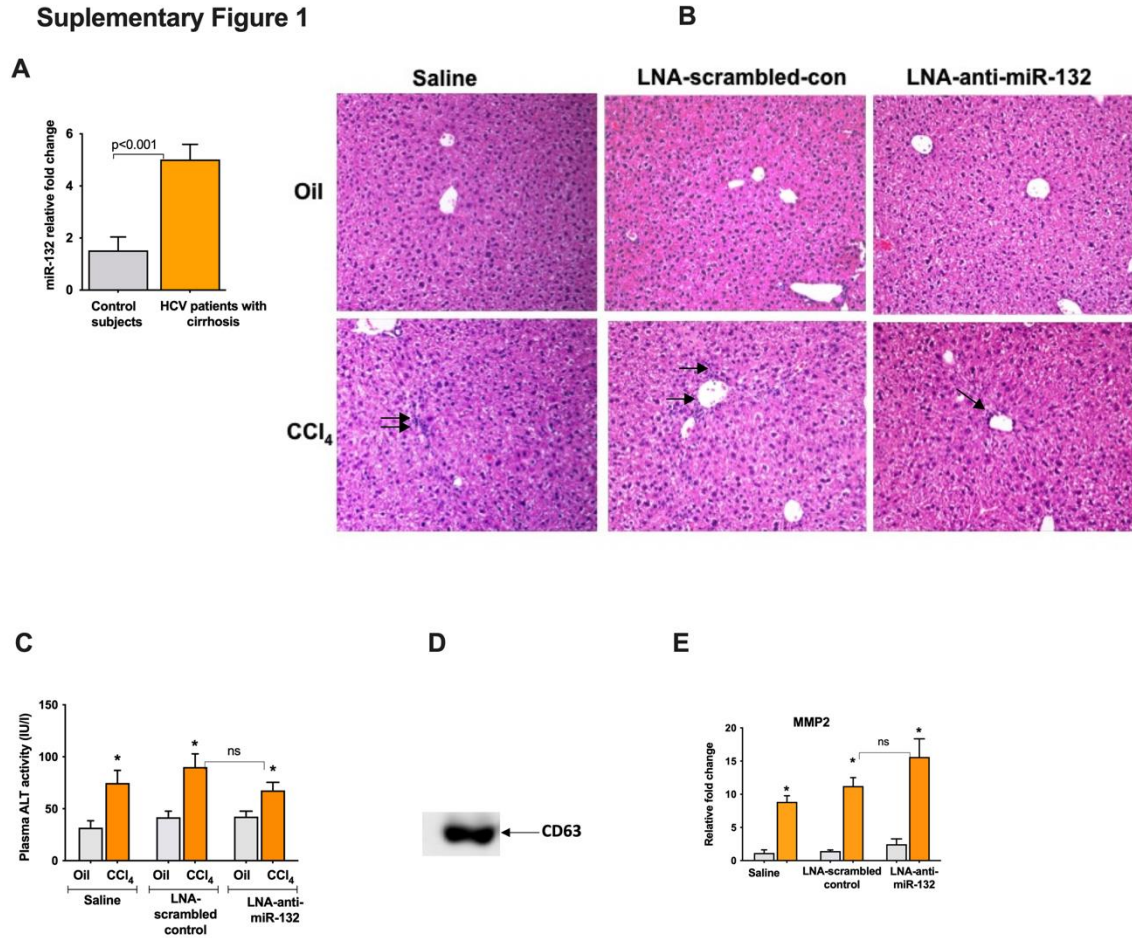

**Figure 1. Induction of miR-132 in liver fibrosis/cirrhosis.** **A)** Liver tissues (10mg) of HCV patients with cirrhosis and respective control individuals (n=8-10/group) were used for total RNA extraction using miRNeasy kit. The levels of miR-132 was quantified using TaqMan miR real time PCR assay and RNU48 was used as an internal control. **B)** C57BL/6 male mice (n=8) were injected either with LNA-scrambled control or LNA-anti-miR-132 (15mg/kg) as described in methods. Some mice received either corn oil or CCl<sub>4</sub> (i.p.; 0.6ml/kg of body weight) for indicated times. Representative images of H&E staining of paraffin embedded liver sections. Arrows indicates mononuclear cells. **C)** ALT levels from plasma samples. **D)** CD63 expression from isolated EVs. **E)** MMP2 mRNA transcripts were detected from RNA by real time qPCR and 18S was used to normalize Ct values. Data represent mean  $\pm$  SEM. Mann-Whitney test or one-way ANOVA was

employed for statistical analysis. \* indicates  $p < 0.05$  compared to respective control mice. Ns: non significant.

### Supplementary Figure 2

**A**

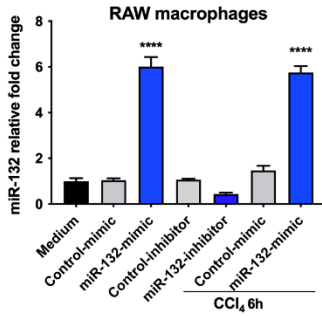

**B**

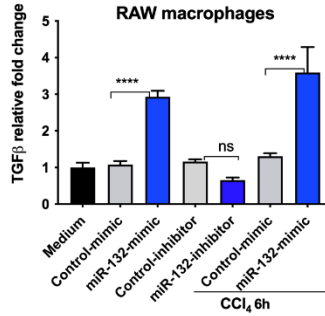

**C**

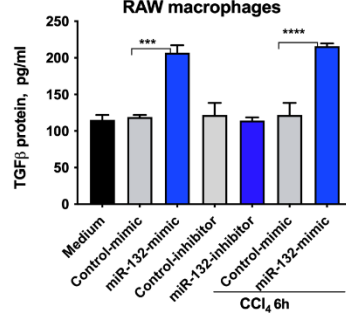

**D**

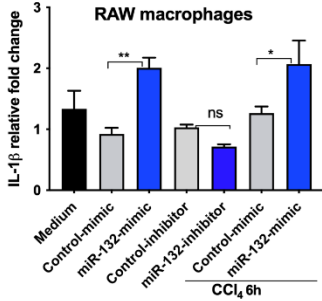

**E**

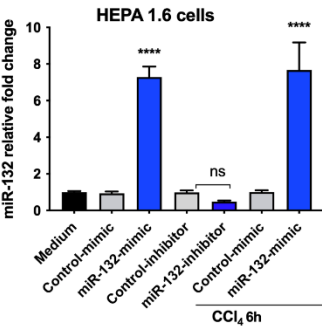

**F**

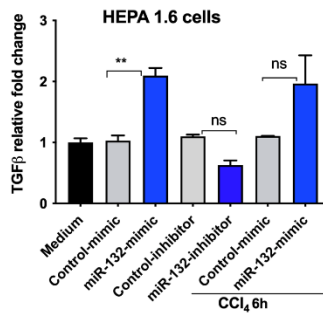

**G**

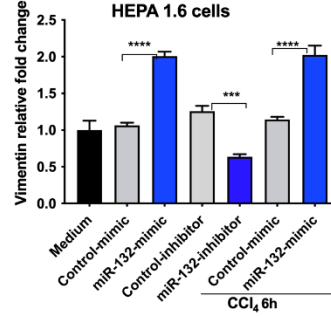

**H**

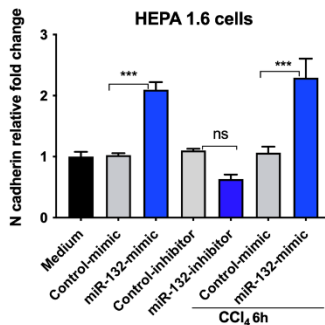

**Figure 2. miR-132 regulates the expression of pro-inflammatory and pro-fibrogenic genes.**

RAW macrophages or Hepa 1.6 hepatocytes were transfected with either control or miR-132 mimic or inhibitor as described in the methods. For the last 6h of transfection, cells were treated or not with 1% CCL<sub>4</sub> and expression of miR-132 (A, E), TGFβ mRNA (B, F) and protein (C) IL-1β mRNA (D), vimentin (G) and n cadherin (H) was analyzed by real time qPCR and ELISA. Data is shown as mean ± SEM (n=3). Mann-Whitney test or one-way ANOVA was employed for statistical analysis. \*, \*\*, \*\*\*, \*\*\*\* indicates p<0.05, p<0.005, p<0.0005, p<0.0001. ns non-significant.

**Supplementary Figure 3**

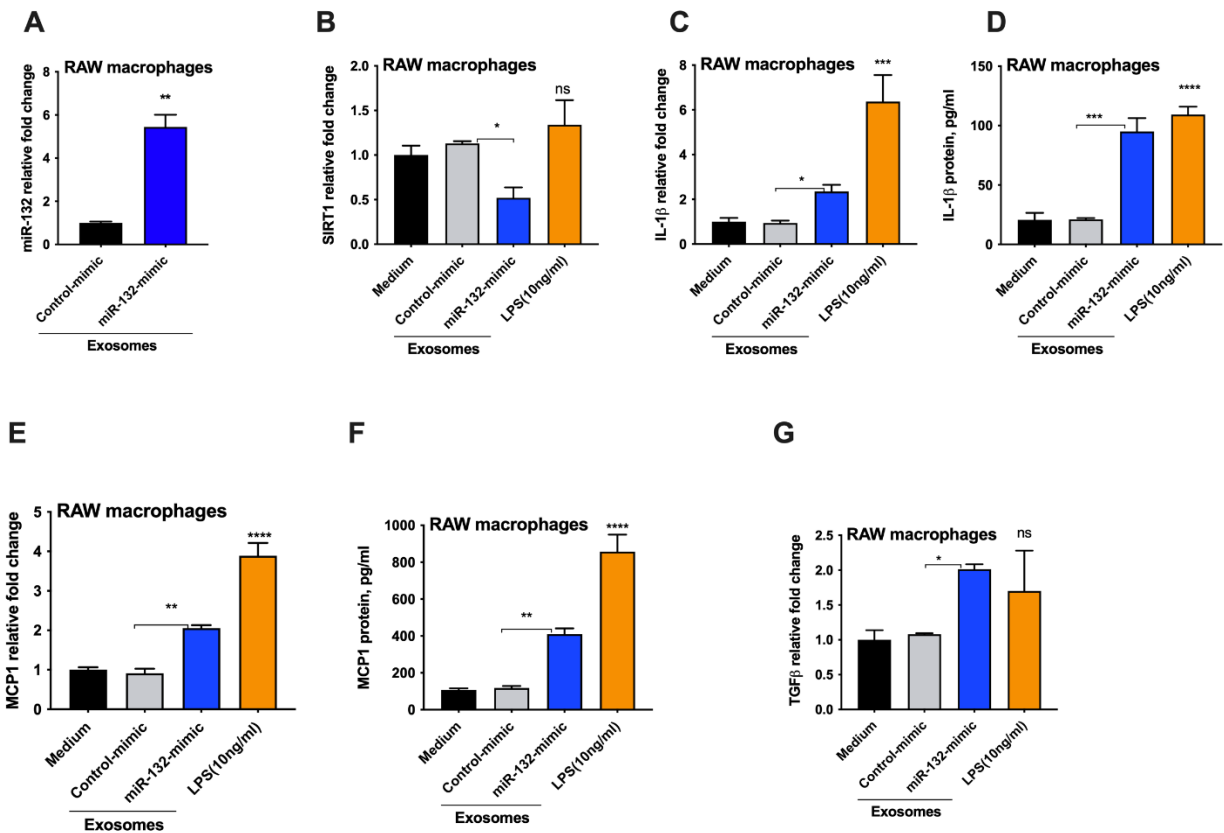

**Figure 3. Exosome mediated delivery of miR-132 mimic regulates SIRT1 and inflammatory genes expression in macrophages.** Control or miR-132 mimic were loaded into exosomes as



described in the methods. Exosomes were added to naïve RAW macrophages for 12 h and afterwards exosomes were washed off and media was replaced and cultured for 24h. Some cells were treated with 10ng/ml LPS for 24h. **A)** miR-132 levels were quantified by real time qPCR and SNORNA-202 was used to normalize Ct values. **B)** SIRT1 **C-D)** IL-1 $\beta$  mRNA and protein levels, **E-F)** MCP1 mRNA and protein levels, and **G)** TGF $\beta$  expression was evaluated by real time qPCR and ELISA respectively. 18S was used to normalize Ct values. Data represent mean  $\pm$  SEM (n=3). one-way ANOVA was employed for statistical analysis. \*, \*\*, \*\*\*, \*\*\*\* indicates  $p < 0.05$ ,  $p < 0.005$ ,  $p < 0.0005$ ,  $p < 0.0001$  respectively compared to control cells. Ns: non-significant.

### Supplementary Figure 4

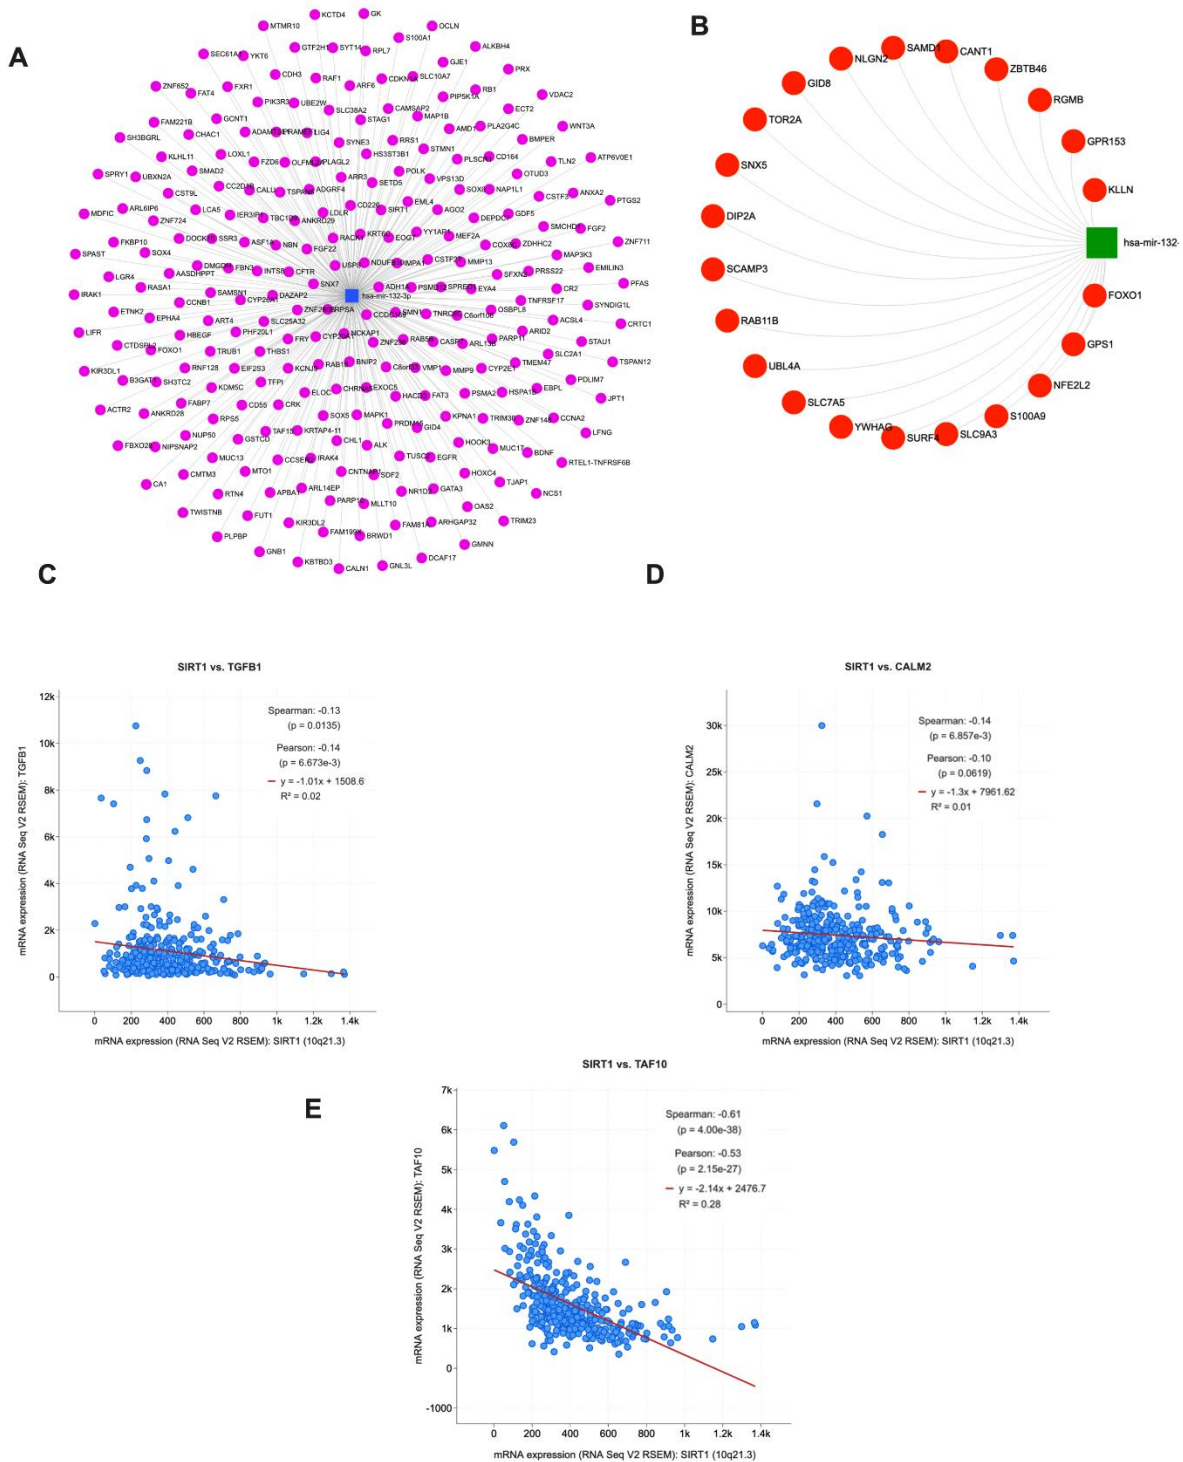

**Figure 4. miR-132 target analysis.** **A)** Targets of miR-132 were identified based on experimentally validated miR/mRNA interaction. **B)** Direct hepatocellular carcinoma-related

targets of miR-132 were identified based on experimentally validated miR/mRNA interaction. C- E) Correlation between miR-132 target gene SIRT1 was evaluated with fibrogenic markers, TGF $\beta$  (C) CALM2 (D) and TAF16 (E).

### Supplementary Figure 5

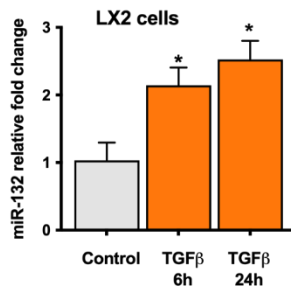

**Figure 5. miR expression in hepatic stellate cells.** LX2, a human HSC cells were treated with 5ng/ml TGF $\beta$  for indicated times and miR-132 levels were quantified and RNU48 was used as an internal control. Data represent mean  $\pm$  SEM. Mann-Whitney test was employed for statistical analysis. \* indicates  $p < 0.05$  compared to control.

### References

1. Momen-Heravi F, Bala S, Kodys K, Szabo G. Exosomes derived from alcohol-treated hepatocytes horizontally transfer liver specific miRNA-122 and sensitize monocytes to LPS. *Sci Rep.* 2015;5:9991. Epub 2015/05/15. doi: 10.1038/srep09991. PubMed PMID: 25973575; PubMed Central PMCID: PMC4650752.
2. Zhang L, Huang D, Wang Q, Shen D, Wang Y, Chen B, Zhang J, Gai L. MiR-132 inhibits expression of SIRT1 and induces pro-inflammatory processes of vascular endothelial inflammation through blockade of the SREBP-1c metabolic pathway. *Cardiovasc Drugs Ther.* 2014;28(4):303-11. Epub 2014/06/14. doi: 10.1007/s10557-014-6533-x. PubMed PMID: 24924687.
3. Chen IC, Chiang WF, Huang HH, Chen PF, Shen YY, Chiang HC. Role of SIRT1 in regulation of epithelial-to-mesenchymal transition in oral squamous cell carcinoma metastasis. *Mol Cancer.* 2014;13:254. Epub 2014/11/27. doi: 10.1186/1476-4598-13-254. PubMed PMID: 25424420; PubMed Central PMCID: PMC4258025.

4. Friedman SL. Hepatic stellate cells: protean, multifunctional, and enigmatic cells of the liver. *Physiol Rev.* 2008;88(1):125-72. Epub 2008/01/16. doi: 10.1152/physrev.00013.2007. PubMed PMID: 18195085; PubMed Central PMCID: PMCPMC2888531.
5. Bala S, Calenda CD, Catalano D, Babuta M, Kodys K, Nasser IA, Vidal B, Szabo G. Deficiency of miR-208a Exacerbates CCl<sub>4</sub>-Induced Acute Liver Injury in Mice by Activating Cell Death Pathways. *Hepatology Commun.* 2020;4(10):1487-501. Epub 2020/10/08. doi: 10.1002/hep4.1540. PubMed PMID: 33024918; PubMed Central PMCID: PMCPMC7527689.
6. Momen-Heravi F, Bala S, Bukong T, Szabo G. Exosome-mediated delivery of functionally active miRNA-155 inhibitor to macrophages. *Nanomedicine.* 2014;10(7):1517-27. Epub 2014/04/02. doi: 10.1016/j.nano.2014.03.014. PubMed PMID: 24685946; PubMed Central PMCID: PMCPMC4180003.
